# Supplementary material for: Determinants of Changes in the Diet Quality of Japanese Adults during the Coronavirus Disease 2019 Pandemic
Source: MDPI journal article supplement (doi:10.3390/nu15010131), 2022-12-27
Supplement: s1 [file s1]

**Table S1.** Food group intakes according to changes in the quality of dietary patterns

|                                                                      | Unadjusted            |                   |                       |                   |                            |                   |                       | Adjusted              |                   |                       |                   |                            |                   |                       |
|----------------------------------------------------------------------|-----------------------|-------------------|-----------------------|-------------------|----------------------------|-------------------|-----------------------|-----------------------|-------------------|-----------------------|-------------------|----------------------------|-------------------|-----------------------|
|                                                                      | IDQ ( <i>n</i> = 214) |                   | WDQ ( <i>n</i> = 233) |                   | Others ( <i>n</i> = 1,654) |                   | <i>P</i> <sup>1</sup> | IDQ ( <i>n</i> = 214) |                   | WDQ ( <i>n</i> = 233) |                   | Others ( <i>n</i> = 1,654) |                   | <i>P</i> <sup>2</sup> |
|                                                                      | Mean                  | SD                | Mean                  | SD                | Mean                       | SD                |                       | LSM                   | SE                | LSM                   | SE                | LSM                        | SE                |                       |
| Food groups for which daily consumption is recommended <sup>*3</sup> |                       |                   |                       |                   |                            |                   |                       |                       |                   |                       |                   |                            |                   |                       |
| Whole grains                                                         | 1.94                  | 2.25 <sup>a</sup> | 1.48                  | 1.93              | 1.58                       | 2.04 <sup>b</sup> | 0.033                 | 1.91                  | 0.14              | 1.46                  | 0.13              | 1.59                       | 0.05              | 0.049                 |
| Fish and shellfish (excluding processed products)                    | 2.32                  | 1.66 <sup>a</sup> | 1.84                  | 1.34 <sup>b</sup> | 2.00                       | 1.50 <sup>b</sup> | 0.002                 | 2.31                  | 0.10 <sup>a</sup> | 1.85                  | 0.10 <sup>b</sup> | 2.00                       | 0.04 <sup>b</sup> | 0.004                 |
| Lean meats (excluding processed products)                            | 2.52                  | 1.83 <sup>a</sup> | 2.02                  | 1.59 <sup>b</sup> | 1.98                       | 1.55 <sup>b</sup> | <0.001                | 2.47                  | 0.11 <sup>a</sup> | 2.01                  | 0.10 <sup>b</sup> | 1.99                       | 0.04 <sup>b</sup> | <0.001                |
| Eggs                                                                 | 4.16                  | 2.10 <sup>a</sup> | 3.35                  | 2.19 <sup>b</sup> | 3.43                       | 2.18 <sup>b</sup> | <0.001                | 4.13                  | 0.15 <sup>a</sup> | 3.33                  | 0.14 <sup>b</sup> | 3.44                       | 0.05 <sup>b</sup> | <0.001                |
| Milk and dairy products (unsweetened)                                | 4.22                  | 2.47 <sup>a</sup> | 3.47                  | 2.49 <sup>b</sup> | 3.72                       | 2.52 <sup>b</sup> | 0.005                 | 4.18                  | 0.17 <sup>a</sup> | 3.44                  | 0.16 <sup>b</sup> | 3.73                       | 0.06 <sup>b</sup> | 0.005                 |
| Soy and soy products                                                 | 4.02                  | 2.30 <sup>a</sup> | 2.75                  | 2.02 <sup>b</sup> | 3.24                       | 2.24 <sup>c</sup> | <0.001                | 4.00                  | 0.15 <sup>a</sup> | 2.75                  | 0.14 <sup>b</sup> | 3.25                       | 0.05 <sup>c</sup> | <0.001                |
| Green and yellow vegetables                                          | 4.65                  | 2.03 <sup>a</sup> | 3.35                  | 2.31 <sup>b</sup> | 3.80                       | 2.28 <sup>c</sup> | <0.001                | 4.58                  | 0.15 <sup>a</sup> | 3.33                  | 0.14 <sup>b</sup> | 3.81                       | 0.05 <sup>c</sup> | <0.001                |
| Other vegetables                                                     | 5.08                  | 1.86 <sup>a</sup> | 3.60                  | 2.34 <sup>b</sup> | 4.08                       | 2.26 <sup>c</sup> | <0.001                | 5.03                  | 0.15 <sup>a</sup> | 3.57                  | 0.14 <sup>b</sup> | 4.09                       | 0.05 <sup>c</sup> | <0.001                |
| Seaweeds                                                             | 2.72                  | 2.10 <sup>a</sup> | 1.82                  | 1.66 <sup>b</sup> | 2.08                       | 1.89 <sup>b</sup> | <0.001                | 2.72                  | 0.13 <sup>a</sup> | 1.83                  | 0.12 <sup>b</sup> | 2.08                       | 0.05 <sup>b</sup> | <0.001                |
| Mushrooms                                                            | 2.65                  | 2.02 <sup>a</sup> | 2.07                  | 1.74 <sup>b</sup> | 2.12                       | 1.79 <sup>b</sup> | <0.001                | 2.60                  | 0.12 <sup>a</sup> | 2.06                  | 0.12 <sup>b</sup> | 2.13                       | 0.04 <sup>b</sup> | <0.001                |
| Potatoes                                                             | 1.93                  | 1.52 <sup>a</sup> | 1.47                  | 1.14 <sup>b</sup> | 1.60                       | 1.30 <sup>b</sup> | <0.001                | 1.89                  | 0.09 <sup>a</sup> | 1.47                  | 0.09 <sup>b</sup> | 1.60                       | 0.03 <sup>b</sup> | 0.002                 |
| Fruits (excluding processed products)                                | 3.23                  | 2.35 <sup>a</sup> | 2.28                  | 2.19 <sup>b</sup> | 2.35                       | 2.19 <sup>b</sup> | <0.001                | 3.18                  | 0.15 <sup>a</sup> | 2.25                  | 0.14 <sup>b</sup> | 2.36                       | 0.05 <sup>b</sup> | <0.001                |
| Food groups for which daily consumption is not recommended           |                       |                   |                       |                   |                            |                   |                       |                       |                   |                       |                   |                            |                   |                       |
| Processed meat or fish products                                      | 2.04                  | 1.65              | 2.26                  | 1.71              | 2.05                       | 1.59              | 0.155                 | 2.03                  | 0.11              | 2.27                  | 0.11              | 2.05                       | 0.04              | 0.152                 |
| Snacks and desserts                                                  | 3.06                  | 2.30 <sup>a</sup> | 3.77                  | 2.24 <sup>b</sup> | 3.03                       | 2.25 <sup>a</sup> | <0.001                | 2.97                  | 0.15 <sup>a</sup> | 3.73                  | 0.15 <sup>b</sup> | 3.05                       | 0.06 <sup>a</sup> | <0.001                |
| Alcoholic beverages                                                  | 2.02                  | 2.22              | 2.32                  | 2.33              | 2.14                       | 2.32              | 0.365                 | 2.21                  | 0.15              | 2.38                  | 0.14              | 2.10                       | 0.05              | 0.173                 |
| Sweetened beverages                                                  | 2.16                  | 2.25              | 2.45                  | 2.39              | 2.11                       | 2.21              | 0.089                 | 2.21                  | 0.15              | 2.46                  | 0.15              | 2.10                       | 0.06              | 0.067                 |
| Frozen meals                                                         | 1.34                  | 1.10 <sup>a</sup> | 1.91                  | 1.50 <sup>b</sup> | 1.55                       | 1.37 <sup>a</sup> | <0.001                | 1.35                  | 0.09 <sup>a</sup> | 1.93                  | 0.09 <sup>b</sup> | 1.55                       | 0.03 <sup>a</sup> | <0.001                |
| Instant products                                                     | 1.19                  | 1.04 <sup>a</sup> | 1.89                  | 1.60 <sup>b</sup> | 1.41                       | 1.25 <sup>c</sup> | <0.001                | 1.23                  | 0.09 <sup>a</sup> | 1.91                  | 0.08 <sup>b</sup> | 1.41                       | 0.03 <sup>a</sup> | <0.001                |

\*1 *p* values were calculated using ANOVA. Multiple comparison among groups were based on Bonferroni. There are significant differences between different alphabets. \*2 *p* values were calculated using ANCOVA. Adjusted models include gender, age groups, household income change, and household economic status before the COVID-19.

There are significant differences between different alphabets. \*3 The average score was calculated by scoring 6.5 points for “almost every day”, 3.5 points for “once every two days”, 1.5 points for “1–2 times a week”, and 0.5 points for “almost never eat”.

SD: standard deviation, LSM: least squares mean, SE: standard error.
